1 **Title:** HuR -dependent SOD2 protein synthesis is an early adaptation of ovarian cancer cells in  
2 response to anchorage independence

3

4 **Authors:** Yeon Soo Kim<sup>1</sup>, Jaclyn E. Welles<sup>2</sup>, Priscilla W. Tang<sup>1</sup>, Zaineb Javed<sup>1</sup>, Amal T. Elhaw<sup>1</sup>,  
5 Karthikeyan Mythreye<sup>3</sup>, Scot R. Kimball<sup>2</sup>, Nadine Hempel<sup>1,4,\*</sup>

6 <sup>1</sup> Department of Pharmacology, College of Medicine, Pennsylvania State University, Hershey,  
7 PA, USA

8 <sup>2</sup> Department of Cellular and Molecular Physiology, College of Medicine, Pennsylvania State  
9 University, Hershey, PA, USA

10 <sup>3</sup> Department of Pathology, University of Alabama at Birmingham, Birmingham, AL, USA

11 <sup>4</sup> Department of Obstetrics and Gynecology, College of Medicine, Pennsylvania State  
12 University, Hershey, PA USA

13

14 **\*Corresponding Author:**

15 Nadine Hempel, Ph.D.

16 Department of Pharmacology

17 Penn State University College of Medicine

18 MC R130, 500 University Drive

19 Hershey PA 17033-0850

20 Ph: 717-531-4037

21 Email: [nhempel@psu.edu](mailto:nhempel@psu.edu)

## 22 **Abstract**

23 The presence of malignant ascites is a common feature of advanced stage ovarian cancer. During  
24 metastasis, as cells detach from the tumor and extravasate into the peritoneal fluid, ovarian  
25 cancer cells must adapt to survive the loss of anchorage support and evade anoikis. An important  
26 pro-survival adaptation in this context is the ability of tumor cells to increase their antioxidant  
27 capacity and restore cellular redox balance. We previously showed that the mitochondrial  
28 superoxide dismutase SOD2 is necessary for ovarian cancer cell anoikis resistance, anchorage-  
29 independent survival and spheroid formation, and intraperitoneal spread *in vivo*. We now  
30 demonstrate that the upregulation of SOD2 protein expression is an early event initiated in  
31 response to anchorage independence and occurs at the post-transcriptional level. SOD2 protein  
32 synthesis is rapidly induced in the cytosol within 2 hours of matrix detachment. Polyribosome  
33 profiling demonstrates an increase in the number of ribosomes bound to SOD2 mRNA, indicating  
34 an increase in SOD2 translation in response to anchorage-independence. Mechanistically, we  
35 find that anchorage-independence induces cytosolic accumulation of the RNA binding protein  
36 HuR/ELAVL1, leads to HuR binding to SOD2 mRNA, and that the presence of HuR is necessary  
37 for the increase in SOD2 mRNA association with the heavy polyribosome fraction and SOD2  
38 protein synthesis. Cellular detachment activates the stress-response protein kinase p38 MAPK,  
39 which is necessary for HuR-SOD2 mRNA binding and the rapid increase in SOD2 protein  
40 expression. Moreover, HuR is necessary for optimal cell survival during early stages of anchorage  
41 independence. These findings uncover a novel post-transcriptional stress response mechanism  
42 by which tumor cells are able to rapidly increase their mitochondrial antioxidant capacity to adapt  
43 to stress associated with anchorage-independence.

## 44 Introduction

45 Despite significant improvements in our understanding of the genomic and RNA  
46 expression signatures of ovarian cancer, the 5-year survival rate of patients has remained  
47 relatively low (Torre *et al*, 2018). Epithelial ovarian cancer (EOC), which accounts for 90% of  
48 ovarian cancer cases, remains the most deadly gynecological malignancy, partly due to the  
49 asymptomatic progression to advanced disease. About 80% of patients with high grade serous  
50 adenocarcinoma, the most common subtype of EOC, are diagnosed at stage III and stage IV. At  
51 this stage the 5-year survival rate remains less than 30% (Torre *et al.*, 2018), and is characterized  
52 by significant tumor spread throughout the peritoneal cavity and the accumulation of malignant  
53 ascites (Ahmed & Stenvers, 2013). This peritoneal fluid is thought to further facilitate  
54 transcoelomic metastasis of ovarian cancer by providing a medium in which extravasating cells  
55 disseminate throughout the peritoneal cavity where they eventually invade the mesothelial wall of  
56 the peritoneum, and neighboring organs including the omentum, liver, intestines, and pleural fluid.

57 Disseminated ovarian tumor cells undergo stress adaptation to survive in non-adherent  
58 conditions. One adaptation to evading anchorage-independent cell death, known as anoikis, is by  
59 increased antioxidant capacity to reduce the detachment-induced surges in reactive oxygen  
60 species (ROS) (Jiang *et al*, 2016; Schafer *et al*, 2009). *In vivo* studies have demonstrated that  
61 increased antioxidant enzyme expression and small molecule antioxidant treatment promotes the  
62 metastatic spread of melanoma and breast cancer cells (Davison *et al*, 2013; Piskounova *et al*,  
63 2015), suggesting that the maintenance of redox homeostasis is a key adaptation during  
64 metastasis. Similarly, we have shown that ovarian cancer cells increase their mitochondrial  
65 antioxidant capacity after matrix detachment, by upregulating the expression and activity of the  
66 deacetylase sirtuin 3 (SIRT3), and its target protein the mitochondrial superoxide dismutase  
67 SOD2 (Kim *et al*, 2020). Our previous work demonstrated that SIRT3-dependent SOD2  
68 deacetylation is necessary for SOD2 activity and that upregulation of both SIRT3 and SOD2 are  
69 necessary for anoikis resistance and *in vivo* transcoelomic spread of ovarian cancer cells (Kim *et*  
70 *al.*, 2020).

71 SOD2 is a nuclear encoded mitochondrial protein that is responsive to stress-activated  
72 transcriptional regulation (Kim *et al*, 2017). An extensively studied stress-response transcription  
73 factor implicated in the regulation of antioxidant responses of tumor cells is Nrf2/NFE2L2, which  
74 has been implicated with the increases in SOD2 expression observed in breast cancer and clear  
75 cell ovarian carcinomas (Hart *et al*, 2016; Hemachandra *et al*, 2015; Konstantinopoulos *et al*,  
76 2011). SOD2 transcription is also induced by the sirtuin regulated transcription factor Foxo3A

77 (Kenny *et al*, 2017), and by NF- $\kappa$ B, which has also been implicated in the upregulation of *SOD2*  
78 transcription in response to matrix detachment of breast cancer cells (Kamarajugadda *et al*, 2013).  
79 Although much emphasis has been placed on the SIRT3-dependent regulation of *SOD2* activity  
80 and stress response pathways leading to *SOD2* transcription in cancer, whether translational  
81 regulation contributes to *SOD2* expression in tumor cells has not been investigated in depth.

82 Posttranscriptional and translational regulatory mechanisms are crucial for fine-tuning of  
83 gene expression. In particular, the interplay between mRNAs, miRNAs, and RNA-binding proteins  
84 has been implicated in cancer development and metastasis (Audic & Hartley, 2004; van  
85 Kouwenhove *et al*, 2011; Wurth & Gebauer, 2015). Among RNA binding proteins, HuR exerts  
86 many effects such as increased mRNA stability and translational efficiency by binding to the AU-  
87 and U-rich elements (AREs) in the 3' UTR of target mRNAs (Abdelmohsen & Gorospe, 2010).  
88 Following activation HuR translocates from the nucleus to the cytoplasm, where it binds and  
89 regulates mRNAs that encode proteins involved in oncogenic signaling pathways (Epis *et al*, 2011;  
90 Mazan-Mamczarz *et al*, 2008), anti-apoptosis (Filippova *et al*, 2011), cell cycle (Lal *et al*, 2014;  
91 Wang *et al*, 2000b), and chemoresistance (Raspaglio *et al*, 2010), all of which converge on  
92 accelerated tumorigenesis and aggressive phenotypes (Wang *et al*, 2013). Importantly, HuR can  
93 translocate to the cytoplasm upon genotoxic or environmental stimuli in cancer cells (Lafarga *et*  
94 *al*, 2009; Lal *et al.*, 2014), which suggests that HuR-dependent translation may be a critical stress  
95 adaptation utilized by cancer cells. HuR expression analyses across different malignancies  
96 including ovarian cancer showed that its cytoplasmic accumulation is correlated with advanced  
97 stages and poor prognosis (Denkert *et al*, 2004a; Denkert *et al*, 2004b; Miyata *et al*, 2013; Mrena  
98 *et al*, 2005). However, it is not known if HuR is involved in ovarian cancer metastatic spread, or  
99 specifically upregulated as an adaptation to anchorage independent stress.

100 Interestingly, a transcriptome-wide RNA-binding analysis identified multiple HuR binding  
101 sites in the 3' UTR of *SOD2* mRNA (Lebedeva *et al*, 2011), but the functional consequences of  
102 these sites related to *SOD2* mRNA translation remain elusive. Given that HuR is a stress  
103 responsive RNA binding protein promoting cell survival, we investigated if *SOD2* mRNA is a target  
104 of HuR in tumor cells. In the present work, we show for the first time that *SOD2* mRNA is a target  
105 of HuR in ovarian cancer and that the interaction of HuR with *SOD2* mRNA is required for rapid  
106 *de novo* *SOD2* protein synthesis after matrix detachment in a p38 MAPK dependent manner. Our  
107 study provides evidence for a novel mechanism of *SOD2* regulation in response to acute stress  
108 associated with anchorage-independence. It demonstrates that tumor cells are able to increase  
109 their antioxidant defenses at multiple levels beyond transcription, allowing for rapid adaptations  
110 to stress associated with different stages of tumor metastasis.

## 111 **Results**

### 112 **SOD2 protein expression increases rapidly in response to anchorage independence.**

113           In previous work, we demonstrated that SOD2 activity increases in ovarian cancer cells  
114 within 2 hours in ultra-low attachment (ULA) cell culture conditions, which is followed by increased  
115 transcription within 24 hours in anchorage-independence (Kim *et al.*, 2020). In addition to the  
116 rapid increase in SOD2 superoxide dismutase activity, which we reported to be dependent on  
117 SIRT3 (Kim *et al.*, 2020), it was noted that the cytosolic SOD2 protein pool rapidly increases  
118 following detachment (Fig 1A). Subcellular fractionation demonstrated an average 4.7-fold  
119 increase in OVCA433 cytosolic SOD2 expression after 0.5 hour of cell detachment compared to  
120 attached cells, while a 1.5-fold increase was observed after 2 hours in anchorage-independent  
121 conditions in OVCAR10 cells (Fig 1A&B). In OVCA433 anchorage-independent cultures SOD2  
122 mRNA increases trailed the changes in SOD2 protein expression, suggesting that the rapid rise  
123 in SOD2 protein following detachment is likely independent of increases in transcription in this  
124 cell line (Fig 1C, Supp Fig 3B). To determine if the observed increase in cytosolic SOD2  
125 represents a newly synthesized SOD2 protein pool, cells were treated with the protein synthesis  
126 inhibitor cycloheximide, which decreased total SOD2 protein levels under anchorage  
127 independence (Fig 1D). <sup>35</sup>S-Met/Cys incorporation assays demonstrated a global increase in  
128 protein synthesis immediately following detachment (Suppl. Fig 1A), and subsequent  
129 immunoprecipitation of SOD2 confirmed enhanced synthesis of SOD2 protein in anchorage  
130 independence. After 2 hours of incubation, ovarian cancer cells demonstrated 1.8-fold (OVCA433)  
131 and 2.4-fold (OVCAR10) increases in <sup>35</sup>S-Met/Cys incorporation into the SOD2 protein compared  
132 to attached conditions, which was abrogated by cycloheximide.

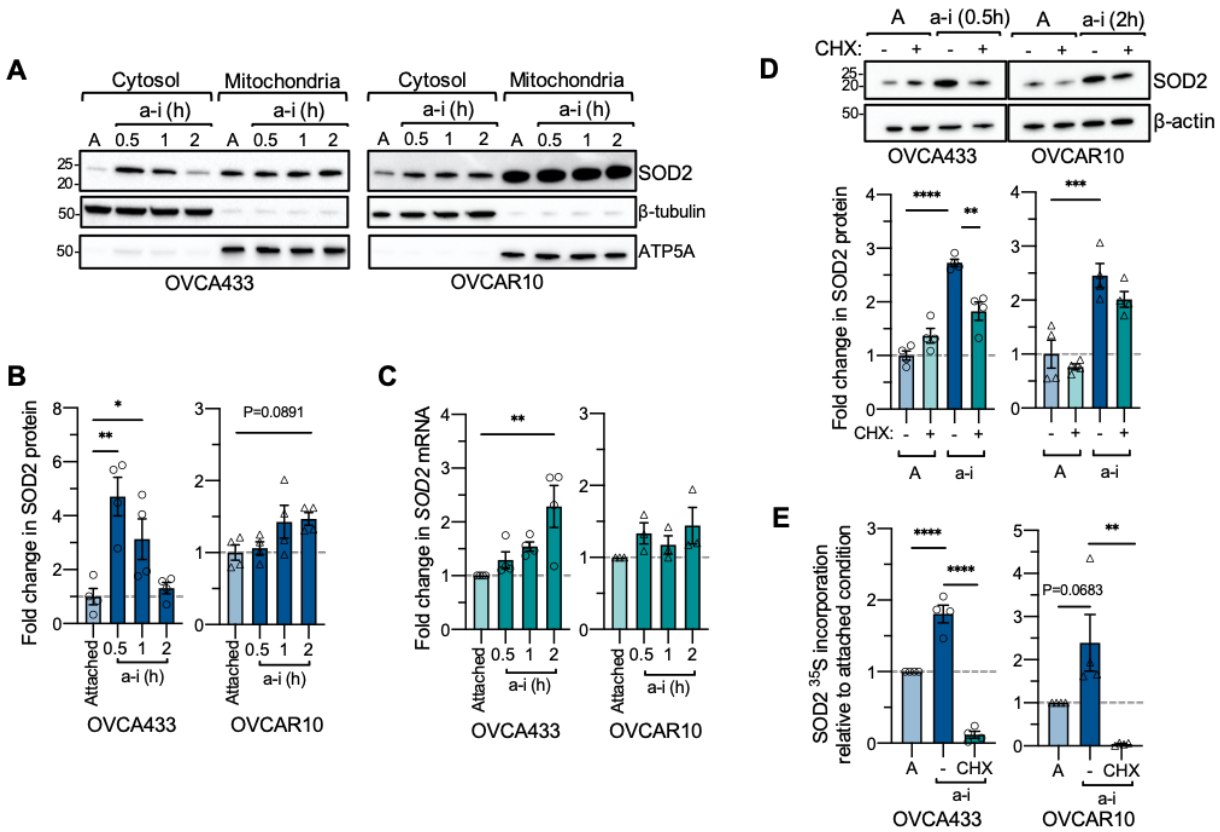

133

**Figure 1.**

- A. The cytosolic SOD2 protein pool increases rapidly in response to anchorage-independence (a-i), compared to attached culture conditions (A). Cells were maintained for indicated times in ULA plates and SOD2 protein expression assessed following cellular fractionation and immunoblotting.
- B. Fold change in SOD2 cytosolic protein expression in response to anchorage-independent (a-i) culture was quantified using densitometry, normalized to  $\beta$ -tubulin loading control and expressed relative to attached (A) culture conditions ( $n=4$ , one-way ANOVA, OVCA433  $P=0.0015$ , OVCAR10  $P=0.0744$ , Dunnett's multiple comparison test  $*P<0.05$ ;  $**P<0.01$ ).
- C. Fold change in SOD2 mRNA in response to short term anchorage-independent culture was assessed using semi-quantitative real time RT-PCR ( $n=3-4$ , one-way ANOVA, OVCA433  $P=0.0069$ , OVCAR10  $P=0.2946$ , Dunnett's multiple comparison test  $*P<0.05$ ;  $**P<0.01$ ).
- D. Total SOD2 protein levels were assessed by immunoblotting in response to culture in anchorage-independent conditions and protein synthesis inhibited by cycloheximide (CHX, 20  $\mu\text{g/mL}$ ;  $n=4$ , one-way ANOVA,  $P<0.0001$ , Tukey's multiple comparison test  $*P<0.05$ ;  $**P<0.01$ ).
- E.  $^{35}\text{S}$ -Met/Cys incorporation assay followed by SOD2 IP (Suppl. Fig 1B&C), demonstrates increased  $^{35}\text{S}$ -Met/Cys incorporation into SOD2 under anchorage independence compared to attached cells, which is abrogated in the presence of cycloheximide ( $n=4$ , one-way ANOVA, OVCA433  $P<0.0001$ , OVCAR10  $P=0.0057$ , Tukey's multiple comparison test  $**P<0.01$ ;  $****P<0.0001$ ).

134

135           To confirm that the increases in SOD2 protein expression are due to *de novo* protein  
136 synthesis, ribosome-mediated mRNA translation was assessed using polyribosome profiling.  
137 Following centrifugation, sucrose gradients were separated into four fractions and RNA was  
138 isolated from each fraction. Fraction 1 contained mRNAs not associated with ribosomes, fraction  
139 2 contained mRNAs associated with one or two ribosomes, fraction 3 contained mRNAs  
140 associated with 3-6 ribosomes (referred to hereafter as 'light polysomes'), and fraction 4  
141 contained mRNAs associated with >6 ribosomes (referred to as 'heavy polysomes'; Fig 2A). In  
142 attached conditions, *SOD2* mRNA was primarily found in fractions 2 and 3 (Fig 2B&C), suggesting  
143 that *SOD2* is translated at a constitutive level in this condition, which is evident by our ability to  
144 readily detect SOD2 protein by western blotting. In anchorage independent conditions the relative  
145 proportion of *SOD2* mRNA shifted to fractions 3 and 4. In particular, anchorage independent cells  
146 showed a significant shift towards an enrichment of *SOD2* mRNA in the heavy polyribosome  
147 fraction 4, demonstrating a larger number of ribosomal units associated with the *SOD2* mRNA  
148 and an increase in *SOD2* mRNA translation in anchorage independent conditions. As a point of  
149 comparison, the mRNA of the nutrient stress response protein ATF4 also shifted into fraction 4 in  
150 response to anchorage-independence (Supp Fig 2).

151

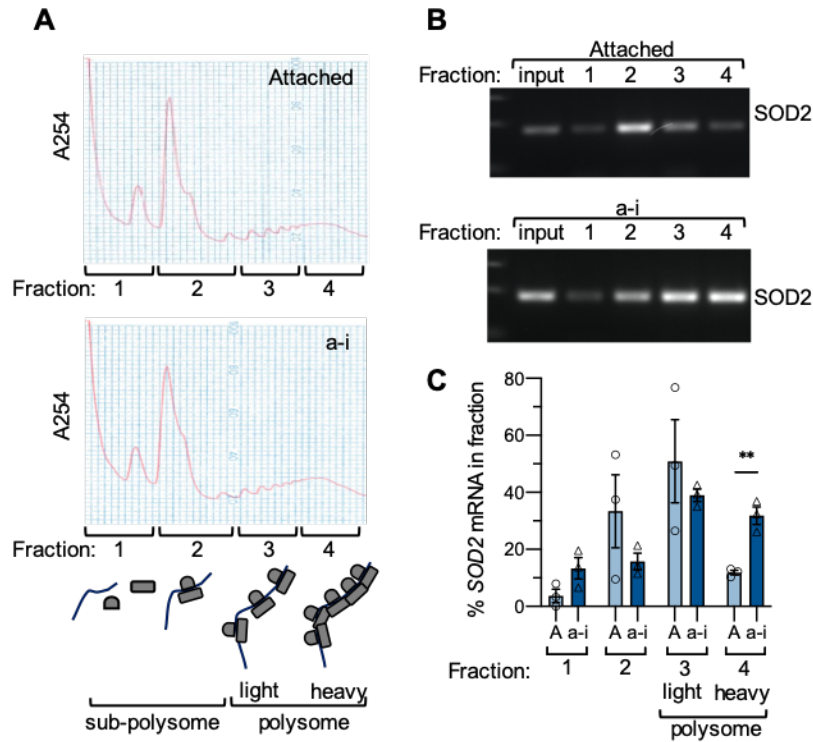

152

**Figure 2.**

- Polyribosome profiling was carried out after OVCA433 cells were cultured in attached (A) and anchorage independent (a-i) conditions (0.5 h) and analyzed by sucrose density gradient centrifugation. Four fractions were collected as indicated, and RNA extracted.
- Polyribosome profiling demonstrates an increase in the percentage of *SOD2* mRNA in the heavy polysomal fraction 4 in response to anchorage independence. Representative image of *SOD2* RT-PCR from RNA isolated from each polysomal fraction.
- Quantification of relative *SOD2* mRNA levels in each fraction demonstrates increased proportion of *SOD2* in fraction 4 following culture in anchorage independent conditions ( $n=3$ ; t-test,  $**P<0.01$ ).

153



154 **HuR accumulates in the cytosol and binds SOD2 mRNA in response to anchorage-**  
155 **independence**

156 Regulation of gene expression at the translational level is mediated by the interplay between  
157 mRNAs and RNA binding proteins. HuR (encoded by the gene *ELAVL1*) is a major RNA binding  
158 protein that has been implicated with alternative splicing, mRNA stability, and translation during  
159 stress conditions (Akaike *et al*, 2014; Lafarga *et al.*, 2009; Lal *et al.*, 2014). HuR recognizes and  
160 binds to AU-, U-rich elements in target mRNA transcripts. Screening of publicly available  
161 transcriptome-wide data sets analyzing HuR RNA binding by RNA  
162 immunoprecipitation sequencing (RIP-seq; ENCODE: ENCSR000CWW, ENCSR000CWZ) and  
163 photoactivatable ribonucleoside-enhanced crosslinking and immunoprecipitation (PAR-CLIP;  
164 GSE29943) revealed that the *SOD2* mRNA contains multiple binding sites for HuR (Fig 3A) (Davis  
165 *et al*, 2018; EncodeProjectConsortium, 2012; Lebedeva *et al.*, 2011). Several clusters of HuR  
166 binding were identified in the *SOD2* 3' UTR within 3.5 kb downstream of the STOP codon (Fig  
167 3A). While the 5' UTR of *SOD2* is less than 75 bp in length, the complete *SOD2* 3' UTR spans  
168 13,424 bp (Fig 3A, Variant 1: NM\_000636). *SOD2* transcripts with variable 3' UTR lengths have  
169 previously been reported (Suppl Fig 3A) (Chaudhuri *et al*, 2012; Church, 1990). Using RT-PCR  
170 we confirmed that OVCA433 and OVCAR10 cells express the longer 3.4 kb 3' UTR containing  
171 the majority of HuR sites identified (Suppl Fig 3B).

172 To examine if HuR regulates *SOD2* protein expression in response to anchorage  
173 independence, cytosolic translocation of HuR in response to culture in ULA plates was first  
174 determined. Concurrent with the increases in cytosolic *SOD2* protein expression (Fig 1A), HuR  
175 cytosolic protein levels increased significantly in OVCA433 within 0.5 hours of anchorage  
176 independence and within 2 hours in OVCAR10 cells (Fig 3B). Based on this finding, we next  
177 investigated if HuR binds to *SOD2* mRNA in anchorage independent conditions using  
178 ribonucleoprotein immunoprecipitation to capture the HuR bound mRNAs using HuR antibody  
179 (Fig 3C). While *SOD2* mRNA could not be detected following HuR IP from attached cells, *SOD2*  
180 mRNA was readily identified by PCR in HuR immunoprecipitates from both OVCA433 (Fig 3C)  
181 and OVCAR10 cells (Supp Fig 3C) under anchorage independent conditions, indicating that  
182 matrix detachment causes the binding of HuR to *SOD2* mRNA.

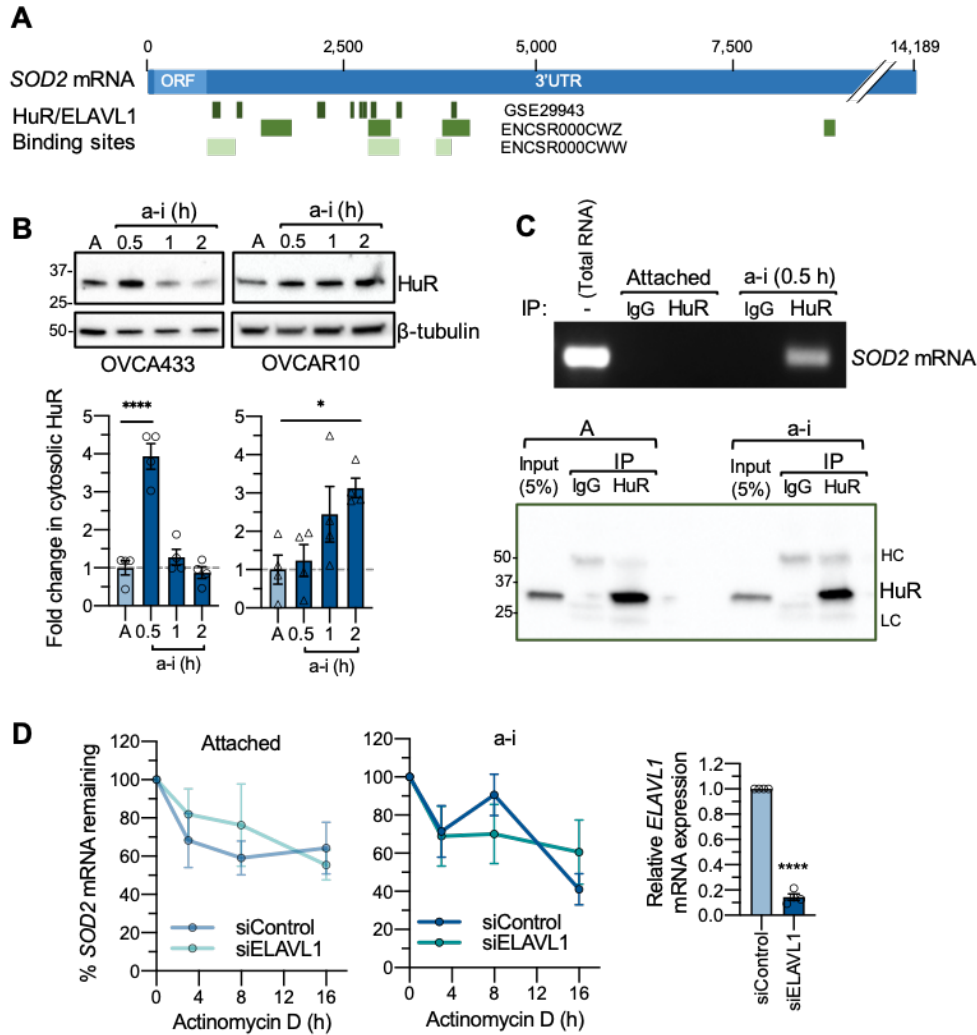

183

**Figure 3.**

- HuR/ELAVL1 binding profiles on the *SOD2* mRNA was assessed using ENCODE RIP-seq data sets ENCSR000CWW and ENCSR000CWZ, and PAR-CLIP data set GSE29943.
- HuR accumulates in the cytosol in response to anchorage-independence ( $n=4$ , one-way ANOVA, OVCA433  $P<0.0001$ , OVCAR10  $P=0.0248$ , Dunnett's multiple comparison test  $**P<0.01$ ;  $***P<0.001$ ).
- Anchorage-independence induces HuR binding to *SOD2* mRNA, as assessed by Ribonucleoprotein Immunoprecipitation and *SOD2* RT-PCR following OVCA433 culture in attached or anchorage independent conditions (a-i, 0.5h).
- HuR knock-down does not affect *SOD2* mRNA stability in attached or anchorage-independent conditions, as determined by Actinomycin D treatment ( $n=4$ ; two-way ANOVA: ns). HuR knock-down was assessed by semi quantitative real time RT-PCR (t-test,  $****P<0.0001$ ).

184

185            Since HuR binds to *SOD2* mRNA shortly after matrix detachment, we investigated the  
186 functional consequences of the HuR-*SOD2* mRNA interaction using siRNA mediated knockdown  
187 of HuR/*ELAVL1* (Fig 3D & Fig 4A). An established function of HuR as a stress response RNA  
188 binding protein is its role in mRNA stabilization within the cytosol (Filippova *et al.*, 2011; Jakstaite  
189 *et al.*, 2015). To determine if HuR has an effect on *SOD2* mRNA stability, we treated ovarian  
190 cancer cells with the transcription inhibitor actinomycin D. Compared to attached conditions,  
191 anchorage independence did not significantly alter *SOD2* mRNA stability in OVCA433 cells (Fig  
192 3D), while decreased *SOD2* mRNA stability in anchorage independence was observed in  
193 OVCAR10 cells compared to attached conditions (Supp Fig 3D, two-way ANOVA, P=0.0104),  
194 indicating that these cells differ in mechanisms regulating *SOD2* mRNA stability. However, HuR  
195 knockdown did not significantly alter *SOD2* mRNA levels in response to actinomycin D treatment  
196 in anchorage independent or attached culture conditions (Fig 3D & Supp Fig 3D), suggesting that  
197 increased binding of HuR to *SOD2* mRNA does not influence *SOD2* mRNA stability.

198

#### 199 **HuR enhances *SOD2* mRNA translation under anchorage independence**

200            We next tested if HuR is necessary for enhanced *SOD2* mRNA translation in anchorage  
201 independence. Following siRNA-mediated HuR (*ELAVL1*) knockdown the increase in *SOD2*  
202 cytosolic protein levels induced by matrix detachment were significantly decreased (Fig 4A). To  
203 further demonstrate that increased *SOD2* protein synthesis in anchorage independent ovarian  
204 cancer cells is HuR dependent, we conducted polyribosome profiling following siRNA mediated  
205 HuR knock-down (Fig 4B). In response to culture in anchorage independent conditions, *SOD2*  
206 mRNA shifted towards the heavy polyribosome fraction (fraction 4) in OVCA433 cells transfected  
207 with a scramble control siRNA (Fig 4C), as demonstrated above in un-transfected cells (Fig 2).  
208 HuR knockdown abrogated this shift of *SOD2* mRNA to the heavy polyribosomal fraction, and  
209 anchorage independent cultured cells lacking HuR displayed a similar distribution of *SOD2* mRNA  
210 in polysomal fractions compared to attached cells (Fig 4C). There was no difference in *SOD2*  
211 mRNA abundance in the subpolysome fractions (fractions 1 & 2) following HuR knock-down,  
212 indicating that a loss of HuR does not lead to a complete loss of *SOD2* mRNA translation, and  
213 suggests that the primary function of HuR is to enhance *SOD2* translation in response to  
214 anchorage independence, boosting *SOD2* protein levels under these conditions.

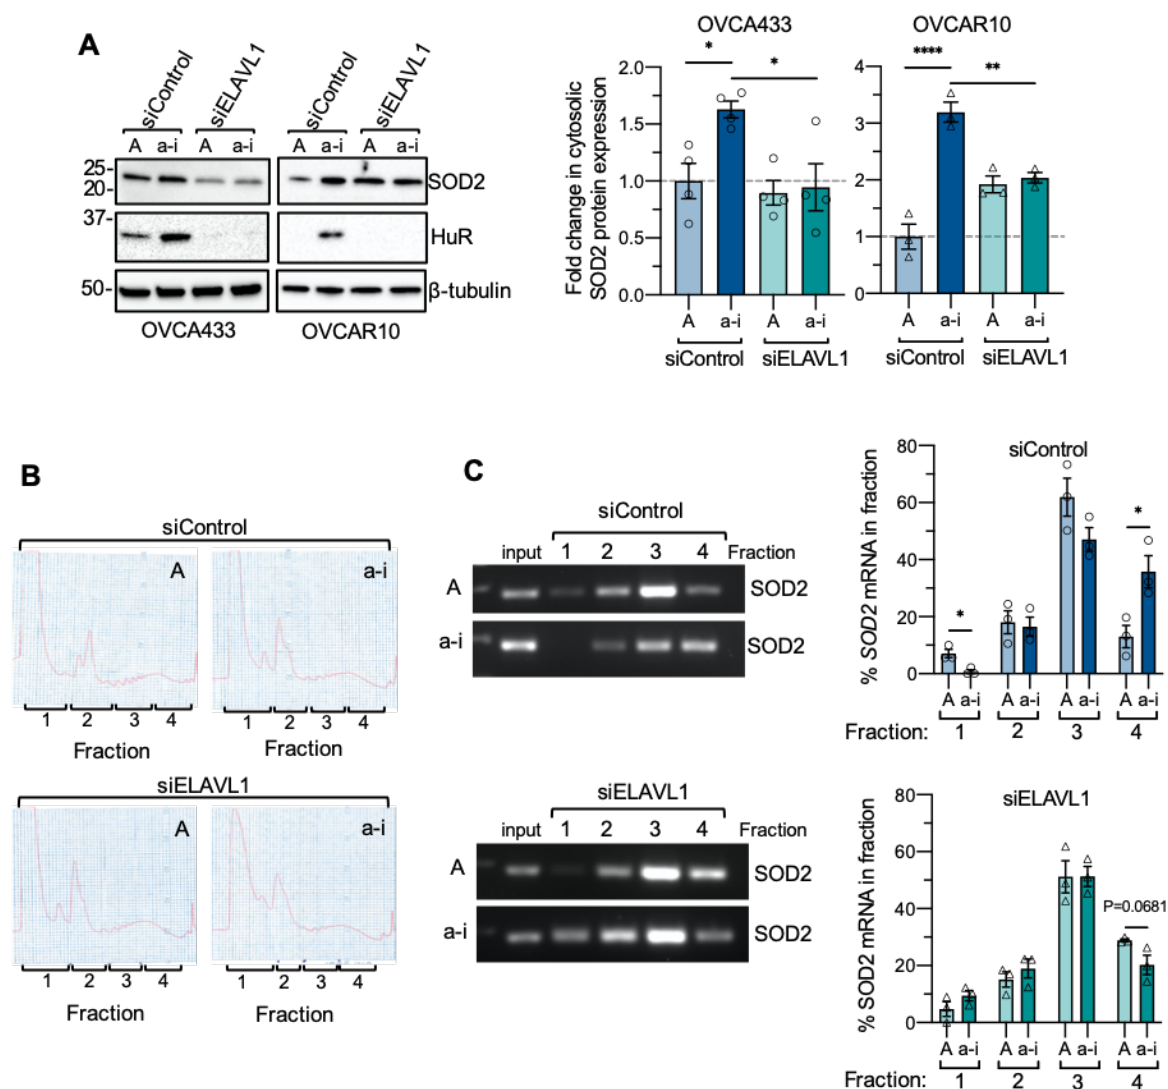

215

**Figure 4.**

- A. HuR/ELAVL1 knock-down abrogates increases in cytosolic SOD2 expression in short term anchorage-independence (a-i, OVCA433 0.5 h; OVCAR10 2 h) compared to attached cultures (A;  $n=3-4$ , one-way ANOVA, OVCA433  $P=0.012$ , OVCAR10  $P=0.0001$ ; Tukey's multiple comparison test  $*P<0.05$ ,  $**P<0.01$ ,  $****P<0.0001$ ).
- B. Polysome profiles of OVCA433 cells cultured in attached (A) and anchorage independent (a-i, 0.5 h) conditions following siRNA-mediated HuR/ELAVL1 knockdown.
- C. HuR knock-down abrogates a shift of SOD2 mRNA into fraction 4 in response to anchorage independence (a-i). Representative image of SOD2 RT-PCR from polyribosome fractions and quantification of relative SOD2 mRNA levels in each fraction shown ( $n=3$ ; t-test,  $*P<0.05$ ).

216

217 **Inhibition of p38 MAPK activation in response to anchorage independence abrogates**  
218 **increases in SOD2 protein expression and HuR-SOD2 mRNA binding.**

219 HuR can be activated in response to cellular stress *via* the p38 MAPK stress response  
220 kinase pathway (Tran *et al*, 2003; Wang *et al.*, 2000b). An increase in p38 MAPK phosphorylation  
221 was previously reported in ovarian cancer cell lines cultured in anchorage independence for 24-  
222 48 h (Carduner *et al*, 2014). We were able to show that short-term anchorage independence (0.5-  
223 2 h) also increased p38 MAPK phosphorylation in OVCA433 and OVCAR10 cell lines (Fig 5A).  
224 To determine if the p38 MAPK pathway is involved in the observed increases in cytosolic SOD2  
225 protein expression during this time, cells were treated with the p38 MAPK inhibitor, SB203580.  
226 SB203580 inhibited the phosphorylation of the p38 target MAPKAPK2 and abrogated the  
227 increases in SOD2 protein expression observed in anchorage independent conditions (Fig. 5B).  
228 In addition, the formation of the HuR-SOD2 mRNA complex was monitored in the presence of  
229 p38 MAPK inhibition. Similar to Fig 3, anchorage independent conditions increased SOD2 mRNA  
230 binding to HuR, while treatment with SB203580 decreased this interaction (Fig. 5C). The above  
231 demonstrates a link between p38 MAPK signaling, HuR binding to the SOD2 mRNA and SOD2  
232 expression in response to cellular detachment. p38 MAPK has previously been shown to  
233 phosphorylate Thr 118 of HuR (Lafarga *et al.*, 2009; Liao *et al*, 2011). In the absence of a  
234 commercially available phospho-Thr118 HuR specific antibody we were unable to successfully  
235 demonstrate that anchorage independence or p38 MAPK inhibition influences phosphorylation of  
236 HuR using HuR IP and a pan phospho-Thr antibody (data not shown). In addition, we analyzed  
237 the effects of p38 MAPK on HuR cellular localization in matrix detached cells, as this had  
238 previously been shown as a mechanism of HuR regulation in response to stress (Slone *et al*,  
239 2016; Tran *et al.*, 2003; Wang *et al.*, 2000b). In OVCAR10 cells, p38 MAPK inhibition decreased  
240 cytosolic HuR accumulation in response to anchorage-independence, while this could not be  
241 consistently observed in OVCA433 cells (Fig. 5D). Although it is beyond the scope of the present  
242 work, the precise mechanism by which p38 MAPK activates HuR require further attention.

243 The above data demonstrate a novel role for HuR in the rapid upregulation of SOD2  
244 translation in response to detachment of ovarian cancer cells. We previously reported that SOD2  
245 is necessary for survival of cells in anchorage independence (Kim *et al.*, 2020). Similarly, HuR  
246 knock-down resulted in an increase in the dead cell fraction of OVCA433 cells cultured for 2 h in  
247 anchorage independent conditions (Fig 6). These data demonstrate that HuR contributes to  
248 cellular survival in early stages of detachment.

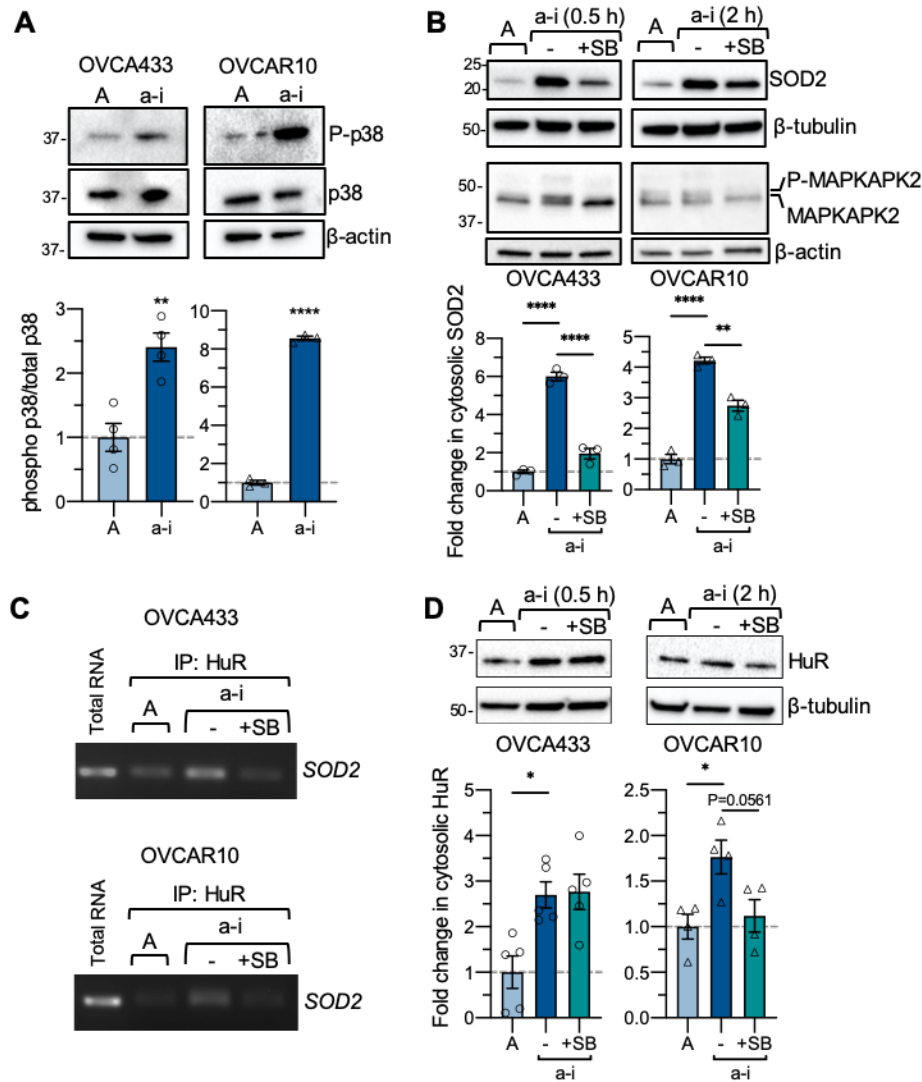

249

**Figure 5.**

- A. p38 MAPK (Thr180/Tyr182) phosphorylation is induced in response to culture in anchorage-independent culture conditions (a-i OVCA433 0.5 h, OVCAR10 2 h; n=4, T-test, \*\* $P < 0.01$ , \*\*\*\* $P < 0.0001$ ).
- B. p38 MAPK inhibition abrogates a-i induced increases in SOD2 expression (n=3, one-way ANOVA  $P < 0.0001$ , Tukey's multiple comparison test \*\* $P < 0.01$ , \*\*\*\* $P < 0.0001$ ).
- C. p38 MAPK inhibition abrogates HuR binding to SOD2 mRNA in anchorage-independence, as assessed by RNA immunoprecipitation.
- D. Effects of p38 MAPK inhibition on cytosolic HuR levels (n=4-5, one-way ANOVA, OVCA433  $P = 0.0053$ , OVCAR10  $P = 0.0221$ , Tukey's multiple comparison test \*\* $P < 0.01$ , \*\*\*\* $P < 0.0001$ ).

250

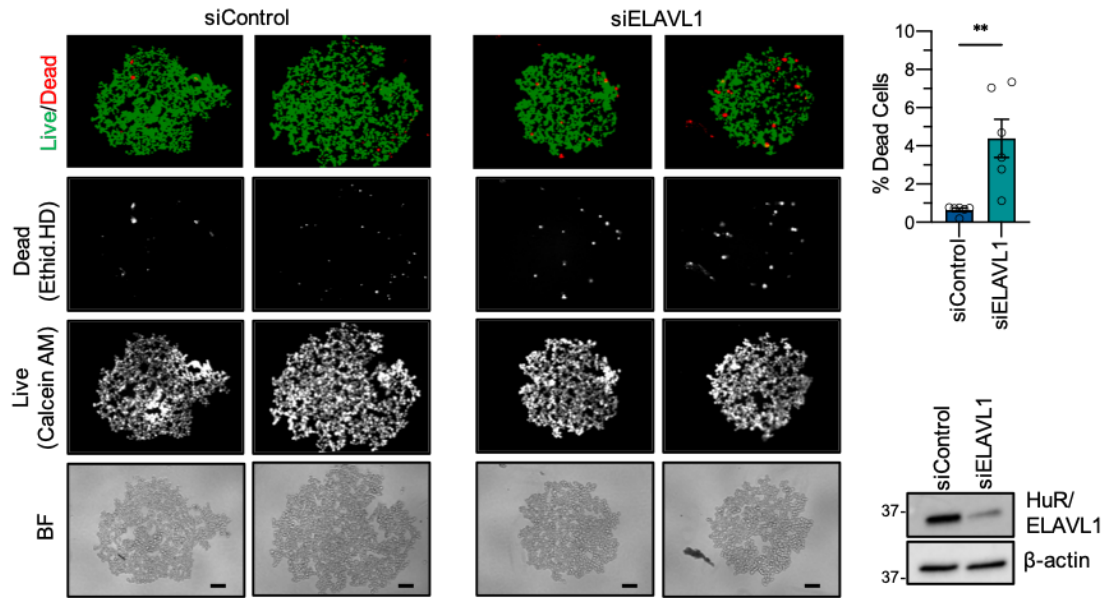

251

**Figure 6.**

HuR/ELAVL1 knock-down increases the dead cell fraction of OVCA433 cells when cultured in anchorage-independence for 2 h. Cells were stained with Ethidium homodimer (dead cells) and Calcein AM (live cells) and fractions of live and dead cells quantified (scale bar = 100 $\mu$ m; n=6; T-test \*\* $P=0.004$ ).

252

## 253 Discussion

254 Recent studies have highlighted that tumor cells need an adequate antioxidant system to  
255 deal with intrinsic and extrinsic increases in ROS associated with metastatic progression (Davison  
256 *et al.*, 2013; Kim *et al.*, 2020; Piskounova *et al.*, 2015). Tumor cells must therefore readily adapt  
257 to increase their antioxidant capacity at the transcriptional and post-transcriptional levels. In line  
258 with these findings, we previously showed that SIRT3-mediated deacetylation of SOD2 drives  
259 transcoelomic metastasis by increasing mitochondrial antioxidant capacity in anchorage-  
260 independent ovarian cancer cells (Kim *et al.*, 2020). The present work demonstrates an additional  
261 SOD2 regulatory mechanism during early-stage anchorage independence. We found that ovarian  
262 cancer cells rapidly adapt to detachment by increasing *SOD2* mRNA translation in a p38 MAPK-  
263 HuR-dependent manner.

264 Aberrant HuR expression has been reported in several malignancies including ovarian  
265 cancer, and an increase in cytoplasmic subcellular localization, where HuR acts to enhance  
266 translation, is linked with worse prognosis (Denkert *et al.*, 2004a; Denkert *et al.*, 2004b; Miyata *et al.*,  
267 2013). HuR's pro-tumorigenic function in the cytoplasm involves selective stabilization and/or  
268 increased translation of target mRNAs. Previously identified HuR targets not only include mRNAs  
269 encoding pro-survival and anti-apoptotic proteins, such as Bcl-2 (Filippova *et al.*, 2011; Ishimaru  
270 *et al.*, 2009; Wang *et al.*, 2000a), but also angiogenic factors and proteins that support invasion  
271 and metastasis, such as VEGF (Levy *et al.*, 1998; Tran *et al.*, 2003). Similar to our findings (Fig  
272 6), HuR knock-down decreased glioma cell survival in anchorage independence (Filippova *et al.*,  
273 2011). It was found that HuR knock-down increased apoptosis and decreased *Bcl-2* mRNA  
274 stability and protein expression, and the investigators demonstrated that HuR has the ability to  
275 bind the 3' UTR of *Bcl-2* family members (Filippova *et al.*, 2011). Moreover, HuR regulation can  
276 interplay with miRNAs to further fine tune expression in cancer, as has been demonstrated in  
277 ovarian cancer with miR-200c (Prisley *et al.*, 2013). This continuously growing repertoire of cancer-  
278 related mRNAs regulated by HuR further emphasizes the critical role of this RNA binding protein  
279 in cancer cells. Moreover, HuR appears to confer survival advantages to cancer cells by rapidly  
280 adjusting gene expression for stress adaptation and resistance to cell death. Our data here  
281 identify SOD2, an important antioxidant enzyme for maintaining mitochondrial redox homeostasis,  
282 as a novel HuR target during early-stage metastasis.

283 HuR is a predominantly nuclear protein which translocates to the cytoplasm upon extrinsic  
284 or intrinsic stimuli and stress signals. Posttranslational modifications of HuR by different signaling  
285 pathways have been shown to affect its RNA binding affinity, nucleo-cytoplasmic shuttling, and



286 the stability of HuR protein depending on the location of residues (Abdelmohsen & Gorospe,  
287 2010). In particular, phosphorylation events are directly involved in spatiotemporal regulation of  
288 HuR. Among different kinases activated during stress, p38 MAPK-dependent phosphorylation on  
289 Thr118 induces cytoplasmic accumulation of HuR and increased p21 mRNA binding after  
290 exposure to ionizing radiation (Lafarga *et al.*, 2009) and enhanced mRNA binding upon IL-1 $\beta$   
291 treatment (Liao *et al.*, 2011). Consistent with these previous findings, we found that stress  
292 associated with matrix detachment activated p38 MAPK (Fig 5). Importantly, activation of the p38  
293 MAPK pathway increased SOD2 cytosolic protein expression under anchorage independence  
294 and we found that the association of HuR with SOD2 mRNA was also p38 MAPK-dependent (Fig  
295 2 & 5). It remains to be determined whether HuR is phosphorylated on Thr118 in anchorage  
296 independent cells, or if p38 MAPK indirectly activates HuR to bind SOD2 mRNA. Moreover,  
297 cytosolic HuR accumulation was not affected by the p38 MAPK inhibitor in one of the ovarian  
298 cancer cells (Fig 5), raising a possibility that additional stress signaling pathways could contribute  
299 to the HuR nucleo-cytoplasmic shuttling in OVCA433 cells.

300 The p38 MAPK pathway primarily governs the cellular response to stress and triggers  
301 apoptosis upon matrix detachment or oncogene-induced ROS accumulation (Dolado *et al.*, 2007;  
302 Owens *et al.*, 2009). During cancer progression, however, elevated levels of intracellular oxidants  
303 accelerate proliferation and transition to malignant phenotypes via upregulation of pro-survival  
304 pathways (Liou *et al.*, 2016; Weinberg *et al.*, 2010), and cancer cells must activate antioxidant  
305 defenses to maintain these elevated ROS at sub-lethal levels. Cancer cells can acquire resistance  
306 by uncoupling the p38 MAPK pro-apoptotic pathway from its ROS-sensing ability (Dolado *et al.*,  
307 2007). Therefore, cancer cells manipulate the cellular p38 MAPK surveillance program to favor  
308 their survival and adapt to a variety of stresses that they encounter during different stages of  
309 cancer. Indeed, downstream targets of p38 MAPK, including HIF-1 $\alpha$  and uPA (urokinase-type  
310 plasminogen activator) (Emerling *et al.*, 2005; Huang *et al.*, 2000) are well-known drivers of  
311 angiogenesis and cancer invasion. Here we show that increased cytosolic SOD2 protein  
312 expression was also dependent on p38 MAPK activity, demonstrating that cancer cells overcome  
313 matrix detachment-induced stress via this pathway. Further investigation of the downstream  
314 mediators linking the p38 MAPK pathway to HuR under conditions of anchorage independence  
315 require further attention and should unveil novel stress response proteins important for anoikis  
316 resistance.

317 While the transcriptional regulation of antioxidant enzymes has been studied widely in the  
318 context of antioxidant response elements and stress response transcription factors such as  
319 Nrf2/NFE2L2, fewer studies have focused on translational regulation of these enzymes. In earlier

320 work, the presence of an unknown stress-responsive *SOD2* mRNA binding protein was reported  
321 across several cells and tissues of different species (Chung *et al.*, 1998; Fazzone *et al.*, 1993). Rat  
322 lung extracts contained a redox-sensitive *SOD2* mRNA binding protein (Fazzone *et al.*, 1993),  
323 and further analysis identified that this is associated with a cis-regulatory region located 111 bp  
324 downstream of the stop codon in rat *SOD2* mRNA (Chung *et al.*, 1998). The 3' UTR of human  
325 *SOD2* mRNA shares ~75% homology with the rat 3' UTR. Based on sequence comparison, we  
326 found that the sequence of the protein binding region partially overlaps with the first HuR binding  
327 sites from the PAR-CLIP analysis (Fig 3A) (Chung *et al.*, 1998; Lebedeva *et al.*, 2011). Among  
328 the different *SOD2* mRNA splice variants, different 3' UTRs have been reported (Supp Fig 3A).  
329 Variant 2 (NM\_001024465) has a short 3' UTR composed of a spliced region that excludes the  
330 majority of the HuR sites identified. Variant 1 (NM\_000636) has been annotated to contain a 13.4  
331 kb 3' UTR. However, past studies have shown that the two most common *SOD2* transcripts  
332 contain either a short 240 bp or a 3,439 bp segment of this 3' UTR, which arise from use of a  
333 proximal and distal polyadenylation site, respectively (Supp Fig 3A) (Chaudhuri *et al.*, 2012;  
334 Church, 1990). Interestingly, Chaudhuri *et al.* reported that the expression of these two *SOD2*  
335 transcripts is altered between quiescent and proliferating cells, with the shorter transcript being  
336 associated with quiescence and increased protein expression (Chaudhuri *et al.*, 2012). Moreover,  
337 radiation increased levels of the shorter *SOD2* transcript levels of the 1.5 kb MnSOD transcript,  
338 with expression of the longer form remaining unaltered (Chaudhuri *et al.*, 2012). The mechanisms  
339 for this radiation induced increase in the short 3' UTR transcript remain unclear. However, we  
340 predict that is likely not HuR-dependent, as only the longer 3.4 kb 3' UTR contains the majority of  
341 identified HuR binding sites, and we verified that ovarian cancer cells used in the present work  
342 express the transcript containing this longer 3' UTR (Supp Fig 3B). It remains to be determined if  
343 and how these alternate 3' UTR *SOD2* transcripts are regulated during different sources of stress,  
344 and how their transcription co-operates with translational regulation through the activation of cell-  
345 specific RNA binding proteins, as well as the interplay with non-coding RNAs, such as miRNAs.  
346 A screen for miRNA binding reveals that the *SOD2* mRNA contains potential binding sites for  
347 miRNAs throughout the length of the 3' UTR. While most are located toward the far upstream  
348 region, several overlap with identified HuR binding sites. The role of miRNAs in regulating *SOD2*  
349 expression have also been interrogated and several miRNAs identified that either positively or  
350 negatively regulate *SOD2* levels in cancer (Kim *et al.*, 2017). It remains to be determined if  
351 changes in miRNA binding further influence the regulation of *SOD2* mRNA translation in  
352 anchorage-independence, and if this interplays with the regulation by HuR.

353           In conclusion, we show for the first time that *SOD2* mRNA is an HuR target in anchorage-  
354 independent ovarian cancer cells. Although *SOD2* regulatory mechanisms have been studied  
355 extensively at the transcriptional level, very few studies have investigated how translational  
356 regulation contributes to adaptable changes in *SOD2* expression. The present findings uncover  
357 a novel post-transcriptional stress response mechanism by which tumor cells are able to rapidly  
358 increase their mitochondrial antioxidant capacity to adapt to stress associated with anchorage-  
359 independence, promoting survival during metastatic progression.

## 360 **Materials and Methods:**

### 361 Cell Culture and Reagents

362 OVCA433 and OVCAR10 cells were provided by Dr. Susan K. Murphy (Duke University) and Dr.  
363 Katherine Aird (University of Pittsburgh), respectively. OVCA433 and OVCAR10 were grown in  
364 RPMI1640 supplemented with 10% FBS at 37 °C with 5% CO<sub>2</sub>. STR profiling is carried out  
365 routinely to validate cell identity, which revealed at the commencement of this work that OVCAR10  
366 cells share the same STR profile as NIH-OVCAR3 cells. It is unclear if the OVCAR10 cell line was  
367 initially derived from the same patient as OVCAR3, or if OVCAR10 cells represent a sub-line  
368 derived from OVCAR3 cells. The protein synthesis inhibitor cycloheximide (Sigma) was added at  
369 a concentration of 20 µg/mL in fully supplemented growth media. For mRNA stability assays,  
370 actinomycin D (Sigma) was added at 10 µg/mL. The p38 MAPK inhibitor SB203580 was used at  
371 a final concentration of 20 µM.

372

### 373 Cell culture in adherent and ultra-low attachment (ULA) conditions

374 For attached conditions, cells were plated in 150-mm dishes and grown to ~80% confluency. For  
375 anchorage independent cell culture, cells were trypsinized and seeded at a density (300,000  
376 cells/2 mL media/well) in 6-well ULA (ultra-low attachment) plates (Corning: 3471) and collected  
377 at different time points for downstream analyses.

378

### 379 siRNA-mediated HuR/ELAVL1 knock-down

380 Cells were transfected with scramble non-targeting SMARTpool control (Dharmacon: D-001810-  
381 10-05) or HuR (ELAVL1)-specific SMARTpool siRNA oligonucleotides (Dharmacon: L-003773-  
382 00-0005) using Lipofectamine RNAiMAX (Invitrogen), and knock-down confirmed by western  
383 blotting.

384

### 385 Subcellular Fractionation

386 Cells in adherent and ULA plates were collected and the cell pellets were washed with ice-cold  
387 PBS. The cell pellets were processed as described in Sugiura *et al.* (Sugiura *et al.*, 2017). Briefly,  
388 cells were centrifuged and resuspended in 200-500 µl of ice-cold homogenization buffer (10 mM  
389 HEPES pH 7.4, 220 mM mannitol, 70 mM sucrose, Roche protease and phosphatase inhibitor

390 cocktails). The lysates were homogenized by several passages through 27-G needles. Lysates  
391 were centrifuged at 800 g for 10 min, followed by centrifugation of the supernatants at 2,500 g for  
392 15 min at 4 °C. The mitochondrial pellets were resuspended in homogenization buffer and the  
393 supernatants were centrifuged at 100,000g for 1 h at 4 °C using a Beckman Coulter Optima MAX  
394 Ultracentrifuge. Post-centrifugation supernatants containing cytosolic fractions were transferred  
395 to new tubes and used for immunoblotting.

396

#### 397 Immunoblotting

398 Protein concentrations were measured using the Pierce BCA protein assay kit. An equal amount  
399 of protein lysates was loaded onto 4-20% SDS-PAGE gels. Following electrophoresis, proteins  
400 were transferred to PVDF membranes. For detection of proteins, the membranes were incubated  
401 with the following antibodies overnight at 4 °C: SOD2 (A-2, Santa Cruz: sc-133134, 1:500 dilution);  
402  $\beta$ -tubulin (9F3, Cell Signaling Technology: 2128, 1:1,000 dilution), ATP5A (Abcam: ab14748,  
403 1:1000 dilution),  $\beta$ -actin (Thermo: AM4302, 1:10,000 dilution), HuR/ELAVL1 (3A2, Santa Cruz:  
404 sc-5261, 1:500 dilution), Phospho-p38 MAPK (Thr180/Tyr182, Cell Signaling Technology: 9211,  
405 1:1000 dilution), p38 MAPK (A-12, Santa Cruz Biotechnology: sc-7972,  
406 1:1000 dilution), MAPKAPK-2 (Cell signaling technology: 3042, 1:1000 dilution). The blots were  
407 developed using SuperSignal West Femto Maximum Sensitivity Substrate (Thermo: 34096) after  
408 incubation with horseradish peroxidase (HRP)-conjugated secondary antibodies (Amersham  
409 Biosciences) for 1 h at RT.

410

#### 411 Immunoprecipitation (IP)

412 1-1.5 mg of cell lysates were pre-cleared by incubating with 2  $\mu$ g normal rabbit IgG (Cell Signaling  
413 Technology: 2729S) or normal mouse IgG (Millipore: 12-371) on a rotator for 1 h at 4 °C followed  
414 by an additional 1 h incubation with protein A- (Thermo: 20333) or protein G- agarose beads (50  
415  $\mu$ L; Thermo: 20399) at 4 °C. Following centrifugation at 3000g for 10 min supernatants were  
416 transferred to clean tubes and incubated with either IgG or primary antibodies overnight at 4 °C.  
417 50  $\mu$ L of agarose beads were added to the lysates for 1-2 h at 4 °C and the antibody-bead  
418 complexes were washed three times in IP lysis buffer and further processed for downstream  
419 assays.

420

## 421 <sup>35</sup>S Protein Radiolabeling

422 Cells in adherent and ULA plates were treated with EasyTag Express<sup>35</sup>S Protein Labeling Mix  
423 (Perkin Elmer: NEG772), using 40  $\mu$ l <sup>35</sup>S (440 uCi) per 20 mL media in 150-mm dish, 4  $\mu$ l <sup>35</sup>S (44  
424 uCi) /2 mL media/ well in ULA plates, according to a protocol adapted from Gallagher *et al.*  
425 (Gallagher *et al.*, 2008). Following 2 h incubation in the presence of <sup>35</sup>S-L-methionine and <sup>35</sup>S-L-  
426 cysteine, cells were collected, washed with ice-cold PBS, and harvested using RIPA buffer  
427 supplemented with protease and phosphatase inhibitors. The cell lysates were rotated for 30 min  
428 at 4 °C, centrifuged at 12,000 rpm for 30 min at 4 °C and supernatants transferred to new tubes.  
429 After pre-clearing, the lysates were incubated overnight with 2  $\mu$ g of normal rabbit IgG or SOD2  
430 antibody (Abcam: Ab13533). Following SOD2 IP, the lysates were resolved in SDS-PAGE gels.  
431 The SOD2 band in each lane was cut with a razor blade and weighed. The bands were dissolved  
432 in 1 mL of 1X TGS running buffer overnight on a rocker at 4 °C. Next day, dissolved gel pieces  
433 were further heated for 20 min at 60 °C. The dissolved radioactive sample solutions were  
434 transferred to glass vials containing 10 mL of Opti-Fluor (Perkin Elmer) in duplicate (500  $\mu$ l per  
435 vial). Liquid scintillation counting was performed using a Beckman Coulter Scintillation Counter.  
436 The readouts were normalized against the values from untreated samples.

437

## 438 Ribonucleoprotein Immunoprecipitation & RT-PCR

439 Cells were cultured in attached and anchorage independent conditions as described above.  
440 Before harvesting cells, 0.3% formaldehyde was added for 10 min at 37 °C for crosslinking  
441 followed by addition of glycine (final concentration 0.25 M) for 5 min for quenching. RNP-IP was  
442 performed as described in (Raspaglio *et al.*, 2010; Tenenbaum *et al.*, 2002) with modifications.  
443 Briefly, crosslinked cells were lysed in 500-1,000  $\mu$ l NT1 buffer (100 mM KCl, 5 mM MgCl<sub>2</sub>, 10  
444 mM HEPES, [pH 7.0], 0.5% Nonidet P40 [NP40], 1 mM dithiothreitol [DTT], 100 units/mL  
445 SUPERase-In RNase Inhibitor [Invitrogen: AM2694], protease inhibitors [Thermo: 78429], 0.2%  
446 vanadyl ribonucleoside complexes [New England Biolabs: S1402S]). After centrifugation of  
447 lysates at 16,000 g for 15 min, the supernatants were used for IP with normal mouse IgG or HuR  
448 antibody. The antibody-bead mixtures were washed several times with NT2 buffer (50 mM Tris-  
449 HCl [pH 7.4], 150 mM NaCl, 1 mM MgCl<sub>2</sub>, 0.05% NP40, RNAse inhibitor, protease inhibitor). IP  
450 samples for RNA elution were incubated with proteinase K (30  $\mu$ g/100  $\mu$ l NT2 buffer with 0.1%  
451 SDS) for 30 min at 60 °C. RNA was extracted using TRIzol, followed by cDNA synthesis  
452 (Quantabio: 95047) and SOD2 RT-PCR using the PrimeSTAR polymerase (Takara: R010A) with  
453 the following cycles: 98°C for 10 sec, 98°C for 10 sec + 60°C for 10 sec + 72°C for 20 sec X 35-

454 38 cycles, followed by a final extension step at 72°C for 2 min. PCR products were analyzed by  
455 2% agarose gel electrophoresis.

456

#### 457 Polysome Profiling by Sucrose Density Gradient Centrifugation

458 Cells in adherent and ULA plates were incubated with cycloheximide (100 µg/mL) for 10 min at  
459 37 °C before harvesting and were washed twice with ice cold 1X PBS containing cycloheximide.  
460 The cells were homogenized in 500 µl lysis buffer (50 mM HEPES, 75 mM KCl, 5 mM MgCl<sub>2</sub>, 250  
461 mM sucrose, 100 ug/mL cycloheximide, 2mM DTT, 20 U/µl SUPERase-In RNase Inhibitor  
462 [Invitrogen: AM2694], 10% Triton X-100, 13% NaDOC) and polysome profiling carried out as  
463 previously described (Dang Do *et al*, 2009). Lysates were placed on ice for 10 min and centrifuged  
464 at 3000 g for 15 min at 4 °C. 500 µl supernatants were loaded on linear sucrose gradients ranging  
465 from 20% to 47% (10 mM HEPES, KCl 75 mM, 5 mM MgCl<sub>2</sub>, 0.5 mM EDTA) and were separated  
466 by ultracentrifugation in a SW41 rotor at 34,000 rpm for 4 h 15 min at 4 °C (Beckman Coulter).  
467 Subsequently, four sucrose fractions were collected using a UV/VIS absorbance detector. TRIzol  
468 reagent (Invitrogen) was added to each fraction for RNA isolation. Briefly, post-centrifugation at  
469 3,200g for 20 min after addition of 1/5 volume of chloroform, the aqueous layer was transferred,  
470 and 1/2 volume of isopropanol was added for overnight precipitation at -20 °C. RNA was pelleted  
471 by centrifugation at 4,640 rpm for 55 min at 4 °C. RNA pellets were washed with 70% ethanol  
472 twice and dissolved in RNase-free water. After cDNA synthesis and qPCR reactions, final PCR  
473 products were analyzed on 2% agarose gels.

474

#### 475 Semi-quantitative real-time PCR

476 Total RNA was isolated by RNA isolation kit (Zymo Research: R2052) and used for cDNA  
477 synthesis (Quantabio: 95047) according to the manufacturer's instruction. cDNA was mixed with  
478 iTaq™ Universal SYBR® Green Supermix (BioRad) and the primers listed in Table 1. Semi-  
479 quantitative real time RT-PCR was carried out using a BioRad qRT-PCR machine (BioRad), data  
480 normalized to the geometric mean of four housekeeping genes (Table 1), and expressed as fold-  
481 change in expression using the  $2^{-\Delta\Delta CT}$  formula.

482

483

484

485 **Table1:** Primers used for RT-PCR and semi-quantitative real time PCR.

| Primer              | Sense                          | Antisense                    |
|---------------------|--------------------------------|------------------------------|
| SOD2 CDS            | 5'-TCCACTGCAAGGAACAACAG-3'     | 5'-CGTGGTTTACTTTTTGCAAGC-3'  |
| SOD2 3'UTR-A        | 5'-ATAATGCTGGGGTGAGCAAC-3'     | 5'-GCTGAGGTGGGACAATCACT-3'   |
| SOD2 3'UTR-B        | 5'-TGTGTATGCATGCTTGTGGA-3'     | 5'CCACCTTGCCCGTCTATTTA-3'    |
| ATF4                | 5'- TGTCTCCACTCCAGATCAT        | 5'-GGCTCATACAGATGCCACTATC-3' |
| ELAVL1              | 5'-CGCAGAGATTCAGGTTCTCC-3'     | 5'-CCAAACCCTTTGCACTTGTT-3'   |
| Housekeeping genes: |                                |                              |
| GAPDH               | 5'-GAGTCAACGGATTTGGTCGT-3'     | 5'-TTGATTTTGGAGGGATCTCG-3'   |
| 18S                 | 5'-AGAAACGGCTACCACATCCA-3'     | 5'- CACCAGACTTGCCCTCCA-3'    |
| HPRT1               | 5'-TGACCTTGATTTATTTTGCATACC-3' | 5'-CGAGCAAGACGTTTCAGTCCT-3'  |
| TBP                 | 5'-TTGGGTTTTCCAGCTAAGTTCT-3'   | 5'-CCAGGAAATAACTCTGGCTCA-3'  |

486

487 Live/dead staining

488 Live and dead cell fractions of cells cultured for 2 h in anchorage independence was assessed  
489 by staining with 4\_μM Calcein AM and 4\_μM ethidium homodimer (in PBS; Sigma) to visualize  
490 live and dead cells, respectively. Cells were exposed to both dyes for 30 min at 37 °C, followed  
491 by imaging on a Keyence BZ-X700 fluorescence microscope. The percentage of live and dead  
492 cells were quantified using Image J.

493

494 Statistical Analysis

495 All data are representatives of at least three independent experiments. Data are presented as  
496 mean ± SEM with individual replicate values superimposed. Statistical analysis was performed  
497 using GraphPad Prism Software v9, with statistical tests chosen based on experimental design,  
498 as described in figure legends.



499 **Acknowledgements**

500 The authors would like to thank Ms. Sara Shimko and Lydia Kutzler for technical assistance. This  
501 work was supported by the U.S. National Institutes of Health grants R01CA242021 (N.H.) and  
502 R01CA230628 (N.H. & K.M.).

503

504 **Author contributions**

505 Y.S.K. designed the conceptual framework and experiments of the study, carried out the majority  
506 of the experiments and data analysis, prepared the figures and wrote the manuscript. J.E.W., P.T.,  
507 Z.J. and A.E. assisted with experimental execution, and manuscript editing. K.M. and S.R.K.  
508 contributed to experimental design, data interpretation and manuscript editing. N.H. supervised  
509 and conceived the study, contributed to experimental design, assisted in data analysis, and  
510 assisted in writing and editing of the manuscript.

511

512 **Conflict of interest**

513 The authors have no conflicts of interest.

## 514 **References**

- 515 Abdelmohsen K, Gorospe M (2010) Posttranscriptional regulation of cancer traits by HuR. *Wiley*  
516 *Interdiscip Rev RNA* 1: 214-229
- 517 Ahmed N, Stenvers KL (2013) Getting to know ovarian cancer ascites: opportunities for targeted  
518 therapy-based translational research. *Front Oncol* 3: 256
- 519 Akaike Y, Masuda K, Kuwano Y, Nishida K, Kajita K, Kurokawa K, Satake Y, Shoda K, Imoto I,  
520 Rokutan K (2014) HuR regulates alternative splicing of the TRA2beta gene in human colon  
521 cancer cells under oxidative stress. *Mol Cell Biol* 34: 2857-2873
- 522 Audic Y, Hartley RS (2004) Post-transcriptional regulation in cancer. *Biol Cell* 96: 479-498
- 523 Carduner L, Picot CR, Leroy-Dudal J, Blay L, Kellouche S, Carreiras F (2014) Cell cycle arrest  
524 or survival signaling through alphav integrins, activation of PKC and ERK1/2 lead to anoikis  
525 resistance of ovarian cancer spheroids. *Exp Cell Res* 320: 329-342
- 526 Chaudhuri L, Nicholson AM, Kalen AL, Goswami PC (2012) Preferential selection of MnSOD  
527 transcripts in proliferating normal and cancer cells. *Oncogene* 31: 1207-1216
- 528 Chung DJ, Wright AE, Clerch LB (1998) The 3' untranslated region of manganese superoxide  
529 dismutase RNA contains a translational enhancer element. *Biochemistry* 37: 16298-16306
- 530 Church SL (1990) Manganese superoxide dismutase: nucleotide and deduced amino acid  
531 sequence of a cDNA encoding a new human transcript. *Biochim Biophys Acta* 1087: 250-252
- 532 Dang Do AN, Kimball SR, Cavener DR, Jefferson LS (2009) eIF2alpha kinases GCN2 and  
533 PERK modulate transcription and translation of distinct sets of mRNAs in mouse liver. *Physiol*  
534 *Genomics* 38: 328-341
- 535 Davis CA, Hitz BC, Sloan CA, Chan ET, Davidson JM, Gabdank I, Hilton JA, Jain K,  
536 Baymuradov UK, Narayanan AK *et al* (2018) The Encyclopedia of DNA elements (ENCODE):  
537 data portal update. *Nucleic Acids Res* 46: D794-D801
- 538 Davison CA, Durbin SM, Thau MR, Zellmer VR, Chapman SE, Diener J, Wathen C, Leevy WM,  
539 Schafer ZT (2013) Antioxidant enzymes mediate survival of breast cancer cells deprived of  
540 extracellular matrix. *Cancer Res* 73: 3704-3715

- 541 Denkert C, Weichert W, Pest S, Koch I, Licht D, Köbel M, Reles A, Sehouli J, Dietel M,  
542 Hauptmann S (2004a) Overexpression of the embryonic-lethal abnormal vision-like protein HuR  
543 in ovarian carcinoma is a prognostic factor and is associated with increased cyclooxygenase 2  
544 expression. *Cancer Res* 64: 189-195
- 545 Denkert C, Weichert W, Winzer KJ, Müller BM, Noske A, Niesporek S, Kristiansen G, Guski H,  
546 Dietel M, Hauptmann S (2004b) Expression of the ELAV-like protein HuR is associated with  
547 higher tumor grade and increased cyclooxygenase-2 expression in human breast carcinoma.  
548 *Clin Cancer Res* 10: 5580-5586
- 549 Dolado I, Swat A, Ajenjo N, De Vita G, Cuadrado A, Nebreda AR (2007) p38alpha MAP kinase  
550 as a sensor of reactive oxygen species in tumorigenesis. *Cancer Cell* 11: 191-205
- 551 Emerling BM, Plataniias LC, Black E, Nebreda AR, Davis RJ, Chandel NS (2005) Mitochondrial  
552 reactive oxygen species activation of p38 mitogen-activated protein kinase is required for  
553 hypoxia signaling. *Mol Cell Biol* 25: 4853-4862
- 554 EncodeProjectConsortium (2012) An integrated encyclopedia of DNA elements in the human  
555 genome. *Nature* 489: 57-74
- 556 Epis MR, Barker A, Giles KM, Beveridge DJ, Leedman PJ (2011) The RNA-binding protein HuR  
557 opposes the repression of ERBB-2 gene expression by microRNA miR-331-3p in prostate  
558 cancer cells. *J Biol Chem* 286: 41442-41454
- 559 Fazzone H, Wangner A, Clerch LB (1993) Rat lung contains a developmentally regulated  
560 manganese superoxide dismutase mRNA-binding protein. *J Clin Invest* 92: 1278-1281
- 561 Filippova N, Yang X, Wang Y, Gillespie GY, Langford C, King PH, Wheeler C, Nabors LB (2011)  
562 The RNA-binding protein HuR promotes glioma growth and treatment resistance. *Mol Cancer*  
563 *Res* 9: 648-659
- 564 Gallagher JW, Kubica N, Kimball SR, Jefferson LS (2008) Reduced eukaryotic initiation factor  
565 2Bepsilon-subunit expression suppresses the transformed phenotype of cells overexpressing  
566 the protein. *Cancer Res* 68: 8752-8760
- 567 Hart PC, Ratti BA, Mao M, Ansenberger-Fricano K, Shajahan-Haq AN, Tyner AL, Minshall RD,  
568 Bonini MG (2016) Caveolin-1 regulates cancer cell metabolism via scavenging Nrf2 and  
569 suppressing MnSOD-driven glycolysis. *Oncotarget* 7: 308-322

- 570 Hemachandra LP, Shin DH, Dier U, Iuliano JN, Engelberth SA, Uusitalo LM, Murphy SK,  
571 Hempel N (2015) Mitochondrial Superoxide Dismutase Has a Protumorigenic Role in Ovarian  
572 Clear Cell Carcinoma. *Cancer Res* 75: 4973-4984
- 573 Huang S, New L, Pan Z, Han J, Nemerow GR (2000) Urokinase plasminogen  
574 activator/urokinase-specific surface receptor expression and matrix invasion by breast cancer  
575 cells requires constitutive p38alpha mitogen-activated protein kinase activity. *J Biol Chem* 275:  
576 12266-12272
- 577 Ishimaru D, Ramalingam S, Sengupta TK, Bandyopadhyay S, Dellis S, Tholanikunnel BG,  
578 Fernandes DJ, Spicer EK (2009) Regulation of Bcl-2 expression by HuR in HL60 leukemia cells  
579 and A431 carcinoma cells. *Mol Cancer Res* 7: 1354-1366
- 580 Jakstaite A, Maziukiene A, Silkuniene G, Kmieliute K, Gulbinas A, Dambrauskas Z (2015) HuR  
581 mediated post-transcriptional regulation as a new potential adjuvant therapeutic target in  
582 chemotherapy for pancreatic cancer. *World J Gastroenterol* 21: 13004-13019
- 583 Jiang L, Shestov AA, Swain P, Yang C, Parker SJ, Wang QA, Terada LS, Adams ND, McCabe  
584 MT, Pietrak B *et al* (2016) Reductive carboxylation supports redox homeostasis during  
585 anchorage-independent growth. *Nature* 532: 255-258
- 586 Kamarajugadda S, Cai Q, Chen H, Nayak S, Zhu J, He M, Jin Y, Zhang Y, Ai L, Martin SS *et al*  
587 (2013) Manganese superoxide dismutase promotes anoikis resistance and tumor metastasis.  
588 *Cell Death Dis* 4: e504
- 589 Kenny TC, Hart P, Ragazzi M, Sersinghe M, Chipuk J, Sagar MAK, Eliceiri KW, LaFramboise T,  
590 Grandhi S, Santos J *et al* (2017) Selected mitochondrial DNA landscapes activate the SIRT3  
591 axis of the UPR(mt) to promote metastasis. *Oncogene* 36: 4393-4404
- 592 Kim YS, Gupta Vallur P, Jones VM, Worley BL, Shimko S, Shin DH, Crawford LC, Chen CW,  
593 Aird KM, Abraham T *et al* (2020) Context-dependent activation of SIRT3 is necessary for  
594 anchorage-independent survival and metastasis of ovarian cancer cells. *Oncogene* 39: 1619-  
595 1633
- 596 Kim YS, Gupta Vallur P, Phaeton R, Mythreye K, Hempel N (2017) Insights into the  
597 Dichotomous Regulation of SOD2 in Cancer. *Antioxidants (Basel)* 6

- 598 Konstantinopoulos PA, Spentzos D, Fountzilas E, Francoeur N, Sanisetty S, Grammatikos AP,  
599 Hecht JL, Cannistra SA (2011) Keap1 mutations and Nrf2 pathway activation in epithelial  
600 ovarian cancer. *Cancer Res* 71: 5081-5089
- 601 Lafarga V, Cuadrado A, Lopez de Silanes I, Bengoechea R, Fernandez-Capetillo O, Nebreda  
602 AR (2009) p38 Mitogen-activated protein kinase- and HuR-dependent stabilization of p21(Cip1)  
603 mRNA mediates the G(1)/S checkpoint. *Mol Cell Biol* 29: 4341-4351
- 604 Lal S, Burkhart RA, Beeharry N, Bhattacharjee V, Londin ER, Cozzitorto JA, Romeo C, Jimbo  
605 M, Norris ZA, Yeo CJ *et al* (2014) HuR posttranscriptionally regulates WEE1: implications for  
606 the DNA damage response in pancreatic cancer cells. *Cancer Res* 74: 1128-1140
- 607 Lebedeva S, Jens M, Theil K, Schwanhäusser B, Selbach M, Landthaler M, Rajewsky N (2011)  
608 Transcriptome-wide analysis of regulatory interactions of the RNA-binding protein HuR. *Mol Cell*  
609 43: 340-352
- 610 Levy NS, Chung S, Furneaux H, Levy AP (1998) Hypoxic stabilization of vascular endothelial  
611 growth factor mRNA by the RNA-binding protein HuR. *J Biol Chem* 273: 6417-6423
- 612 Liao WL, Wang WC, Chang WC, Tseng JT (2011) The RNA-binding protein HuR stabilizes  
613 cytosolic phospholipase A2 $\alpha$  mRNA under interleukin-1 $\beta$  treatment in non-small cell lung cancer  
614 A549 Cells. *J Biol Chem* 286: 35499-35508
- 615 Liou GY, Döppler H, DelGiorno KE, Zhang L, Leitges M, Crawford HC, Murphy MP, Storz P  
616 (2016) Mutant KRas-Induced Mitochondrial Oxidative Stress in Acinar Cells Upregulates EGFR  
617 Signaling to Drive Formation of Pancreatic Precancerous Lesions. *Cell Rep* 14: 2325-2336
- 618 Mazan-Mamczarz K, Hagner PR, Corl S, Srikantan S, Wood WH, Becker KG, Gorospe M,  
619 Keene JD, Levenson AS, Gartenhaus RB (2008) Post-transcriptional gene regulation by HuR  
620 promotes a more tumorigenic phenotype. *Oncogene* 27: 6151-6163
- 621 Miyata Y, Watanabe S, Sagara Y, Mitsunari K, Matsuo T, Ohba K, Sakai H (2013) High  
622 expression of HuR in cytoplasm, but not nuclei, is associated with malignant aggressiveness  
623 and prognosis in bladder cancer. *PLoS One* 8: e59095
- 624 Mrena J, Wiksten JP, Thiel A, Kokkola A, Pohjola L, Lundin J, Nordling S, Ristimäki A, Haglund  
625 C (2005) Cyclooxygenase-2 is an independent prognostic factor in gastric cancer and its

- 626 expression is regulated by the messenger RNA stability factor HuR. *Clin Cancer Res* 11: 7362-  
627 7368
- 628 Owens TW, Valentijn AJ, Upton JP, Keeble J, Zhang L, Lindsay J, Zouq NK, Gilmore AP (2009)  
629 Apoptosis commitment and activation of mitochondrial Bax during anoikis is regulated by  
630 p38MAPK. *Cell Death Differ* 16: 1551-1562
- 631 Piskounova E, Agathocleous M, Murphy MM, Hu Z, Huddlestun SE, Zhao Z, Leitch AM,  
632 Johnson TM, DeBerardinis RJ, Morrison SJ (2015) Oxidative stress inhibits distant metastasis  
633 by human melanoma cells. *Nature* 527: 186-191
- 634 Prislei S, Martinelli E, Mariani M, Raspaglio G, Sieber S, Ferrandina G, Shahabi S, Scambia G,  
635 Ferlini C (2013) MiR-200c and HuR in ovarian cancer. *BMC Cancer* 13: 72
- 636 Raspaglio G, De Maria I, Filippetti F, Martinelli E, Zannoni GF, Prislei S, Ferrandina G, Shahabi  
637 S, Scambia G, Ferlini C (2010) HuR regulates beta-tubulin isotype expression in ovarian cancer.  
638 *Cancer Res* 70: 5891-5900
- 639 Schafer ZT, Grassian AR, Song L, Jiang Z, Gerhart-Hines Z, Irie HY, Gao S, Puigserver P,  
640 Brugge JS (2009) Antioxidant and oncogene rescue of metabolic defects caused by loss of  
641 matrix attachment. *Nature* 461: 109-113
- 642 Slone S, Anthony SR, Wu X, Benoit JB, Aube J, Xu L, Tranter M (2016) Activation of HuR  
643 downstream of p38 MAPK promotes cardiomyocyte hypertrophy. *Cell Signal* 28: 1735-1741
- 644 Sugiura A, Mattie S, Prudent J, McBride HM (2017) Newly born peroxisomes are a hybrid of  
645 mitochondrial and ER-derived pre-peroxisomes. *Nature* 542: 251-254
- 646 Tenenbaum SA, Lager PJ, Carson CC, Keene JD (2002) Ribonomics: identifying mRNA  
647 subsets in mRNP complexes using antibodies to RNA-binding proteins and genomic arrays.  
648 *Methods* 26: 191-198
- 649 Torre LA, Trabert B, DeSantis CE, Miller KD, Samimi G, Runowicz CD, Gaudet MM, Jemal A,  
650 Siegel RL (2018) Ovarian cancer statistics, 2018. *CA Cancer J Clin* 68: 284-296
- 651 Tran H, Maurer F, Nagamine Y (2003) Stabilization of urokinase and urokinase receptor mRNAs  
652 by HuR is linked to its cytoplasmic accumulation induced by activated mitogen-activated protein  
653 kinase-activated protein kinase 2. *Mol Cell Biol* 23: 7177-7188

- 654 van Kouwenhove M, Kedde M, Agami R (2011) MicroRNA regulation by RNA-binding proteins  
655 and its implications for cancer. *Nat Rev Cancer* 11: 644-656
- 656 Wang J, Guo Y, Chu H, Guan Y, Bi J, Wang B (2013) Multiple functions of the RNA-binding  
657 protein HuR in cancer progression, treatment responses and prognosis. *Int J Mol Sci* 14: 10015-  
658 10041
- 659 Wang W, Caldwell MC, Lin S, Furneaux H, Gorospe M (2000a) HuR regulates cyclin A and  
660 cyclin B1 mRNA stability during cell proliferation. *EMBO J* 19: 2340-2350
- 661 Wang W, Furneaux H, Cheng H, Caldwell MC, Hutter D, Liu Y, Holbrook N, Gorospe M (2000b)  
662 HuR regulates p21 mRNA stabilization by UV light. *Mol Cell Biol* 20: 760-769
- 663 Weinberg F, Hamanaka R, Wheaton WW, Weinberg S, Joseph J, Lopez M, Kalyanaraman B,  
664 Mutlu GM, Budinger GR, Chandel NS (2010) Mitochondrial metabolism and ROS generation are  
665 essential for Kras-mediated tumorigenicity. *Proc Natl Acad Sci U S A* 107: 8788-8793
- 666 Wurth L, Gebauer F (2015) RNA-binding proteins, multifaceted translational regulators in  
667 cancer. *Biochim Biophys Acta* 1849: 881-886
